# Supplementary material for: In Vitro and In Vivo Evaluation of Composite Oral Fast Disintegrating Film: An Innovative Strategy for the Codelivery of Ranitidine HCl and Flurbiprofen
Source: MDPI journal article supplement (doi:10.3390/pharmaceutics15071987), 2023-07-20
Supplement: s1 [file s1]

# In Vitro and In Vivo Evaluation of Composite Oral Fast Disintegrating Film: An Innovative Strategy for the Codelivery of Ranitidine HCl and Flurbiprofen

Aisha Rashid <sup>1</sup>, Syed Haroon Khalid <sup>1</sup>, Muhammad Irfan <sup>1</sup>, Sajid Asghar <sup>1</sup>, Waleed Y. Rizg <sup>2,3</sup>, Fahad Y. Sabei <sup>4</sup>, Eman Alfayez <sup>5</sup>, Hanaa Alkharobi <sup>5</sup>, Awaji Y. Safhi <sup>4</sup>, Khaled M. Hosny <sup>3</sup>, Muhammad Sohail Arshad <sup>6</sup>  
and Ikram Ullah Khan <sup>1,\*</sup>

<sup>1</sup> Department of Pharmaceutics, Faculty of Pharmaceutical Sciences, Government College University Faisalabad, Faisalabad 38000, Pakistan; draisharashid@gmail.com (A.R.); haroonkhalid80@gmail.com (S.H.K.); manipharma1@gmail.com (M.I.); sajuhappa@gmail.com (S.A.)

<sup>2</sup> Center of Innovation in Personalized Medicine (CIPM), 3D Bioprinting Unit, King Abdulaziz University, Jeddah 21589, Saudi Arabia; wrizq@kau.edu.sa

<sup>3</sup> Department of Pharmaceutics, Faculty of Pharmacy, King Abdulaziz University, Jeddah 21589, Saudi Arabia; kmhomar@kau.edu.sa

<sup>4</sup> Department of Pharmaceutics, College of Pharmacy, Jazan University, Jazan 45142, Saudi Arabia; fsabei@jzanu.edu.sa (F.Y.S.); asafhi@jzanu.edu.sa (A.Y.S.)

<sup>5</sup> Department of Oral Biology, Faculty of Dentistry, King Abdulaziz University, Jeddah 80209, Saudi Arabia; ealfayez@kau.edu.sa (E.A.); halkharobi@kau.edu.sa (H.A.)

<sup>6</sup> Department of Pharmaceutics, Faculty of Pharmacy, Bahauddin Zakariya University, Multan 60800, Pakistan; sohailarshad@bzu.edu.pk

\* Correspondence: ikramglt@gmail.com

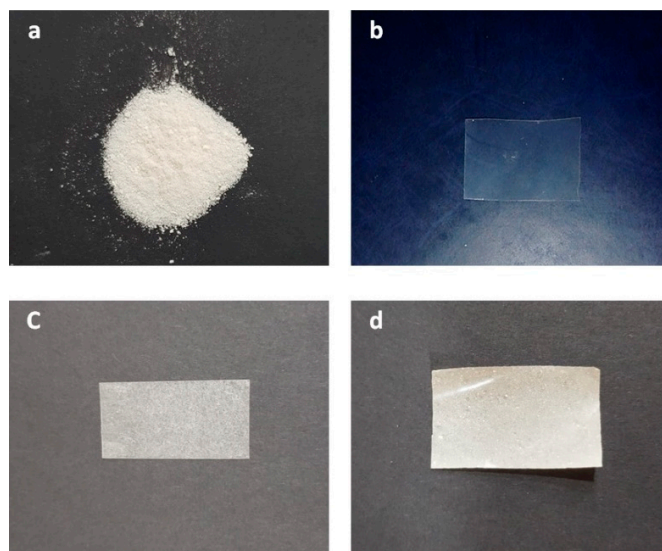

Figure S1. Apparent image of (a) M3, (b) L15, (c) F1, and (d) F2.

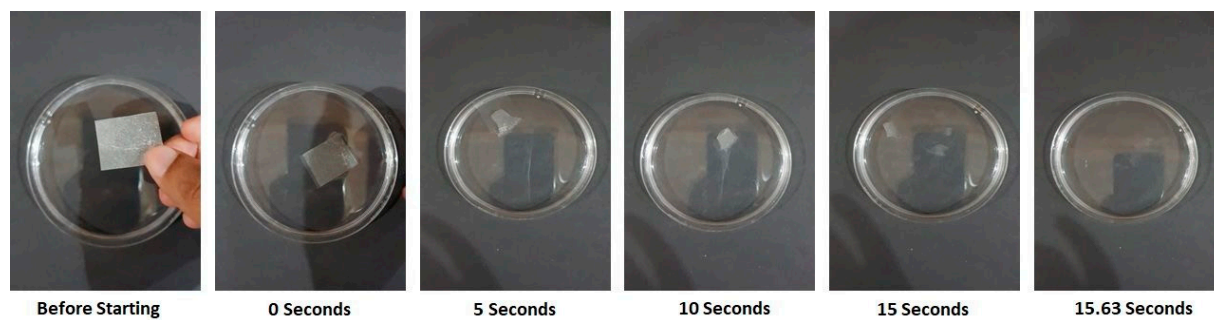

Figure S2. Optical images showing DT of F1.
